# Supplementary material for: NRF2 Deficiency Attenuates Diabetic Kidney Disease in Db/Db Mice via Down-Regulation of Angiotensinogen, SGLT2, CD36, and FABP4 Expression and Lipid Accumulation in Renal Proximal Tubular Cells
Source: MDPI journal article supplement (doi:10.3390/antiox12091715), 2023-09-04
Supplement: s1 [file s1]

# Supplementary Figures

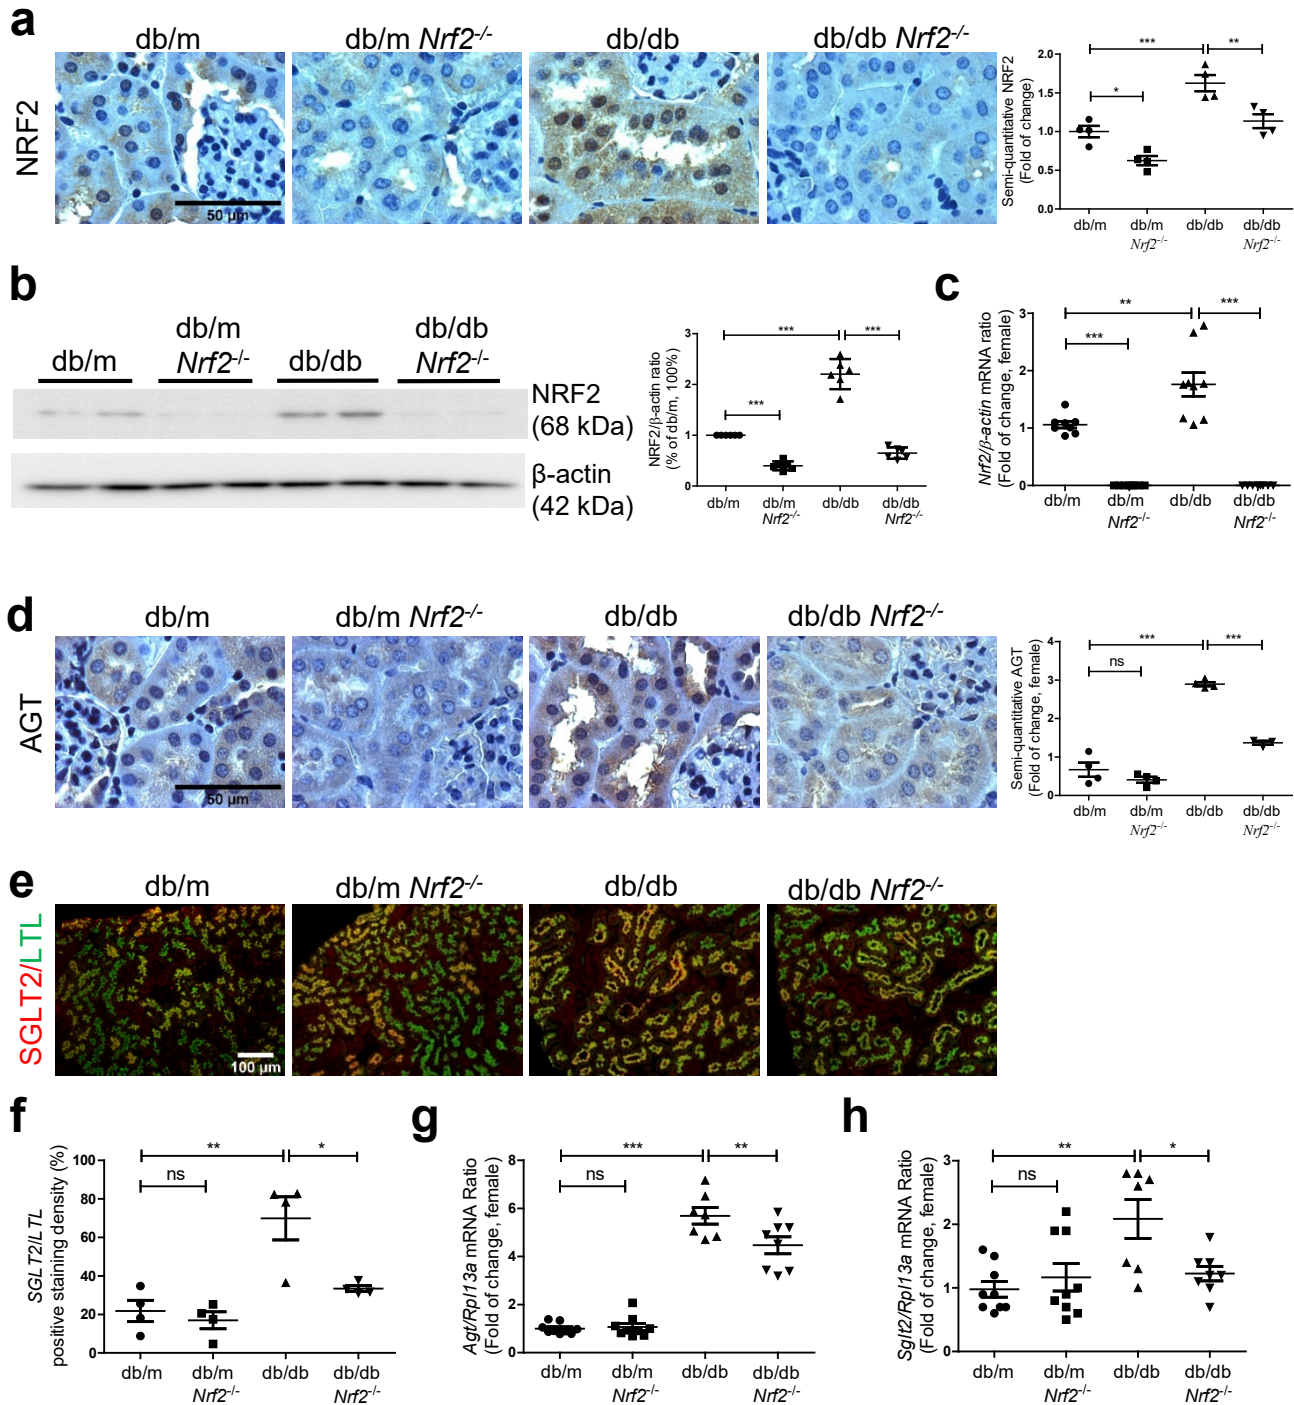

**Figure S1** Nrf2, Keap1, Agt and SglT2 expression in female mouse kidneys

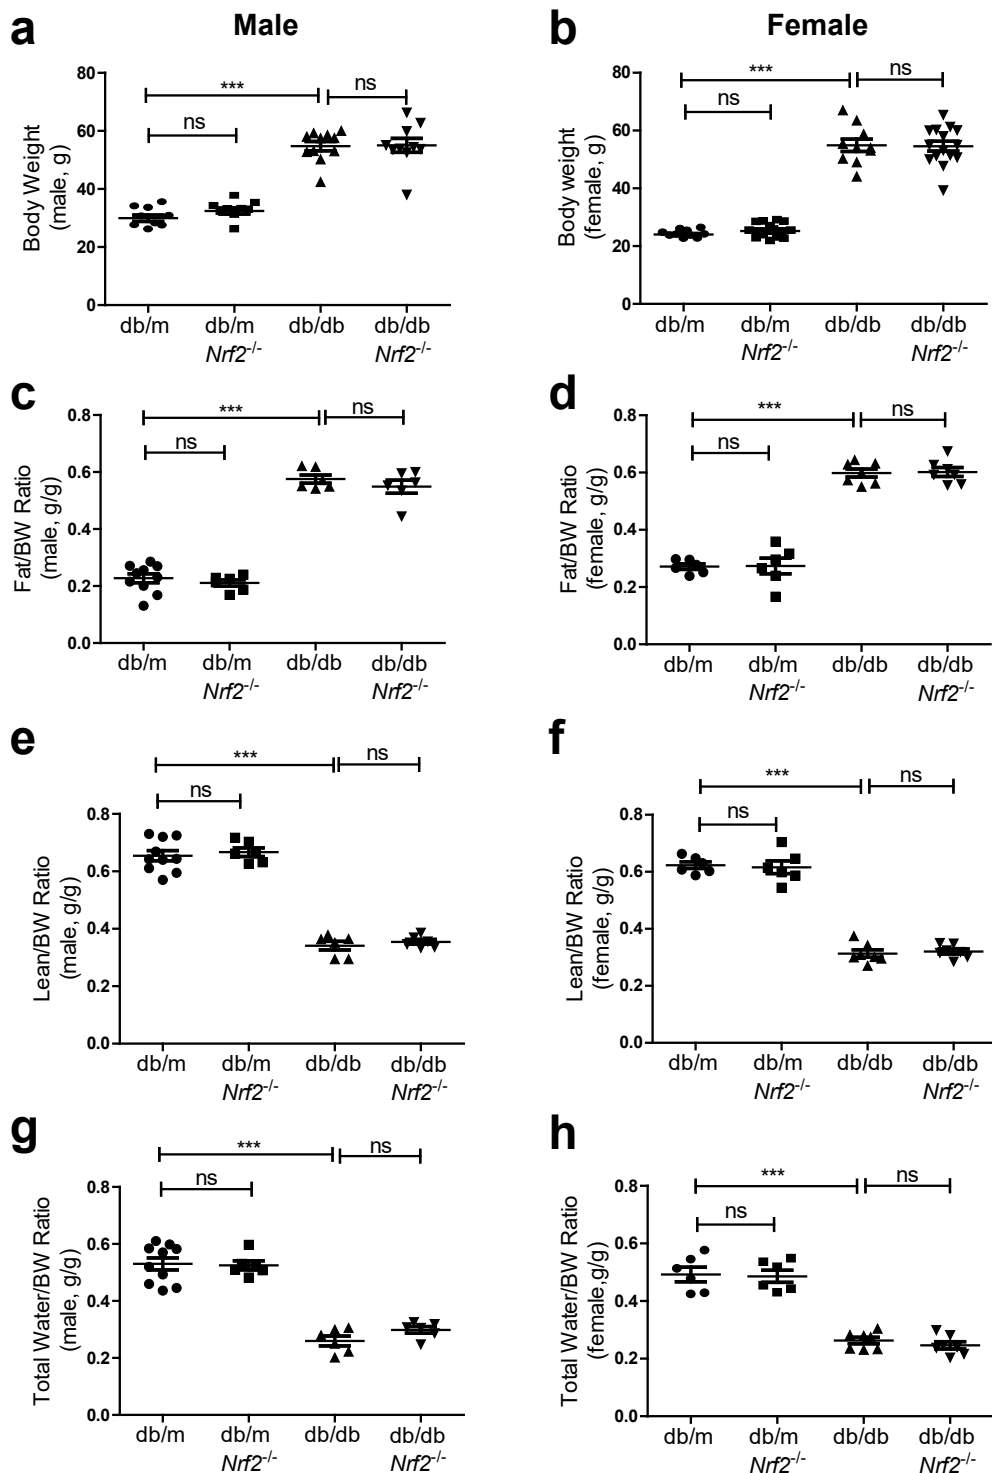

**Figure S2** Physiological parameters in male and female mice at 16 weeks of age.

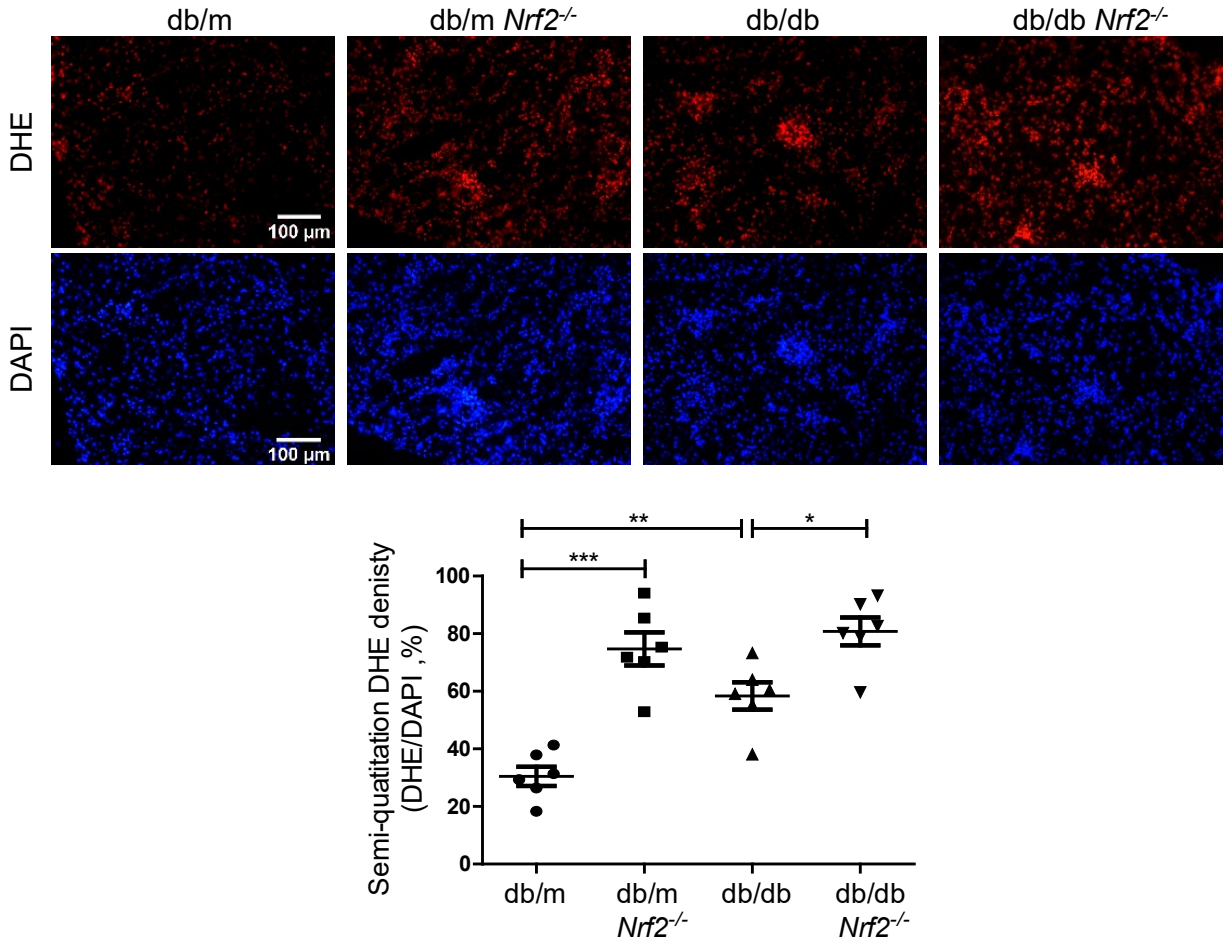

**Figure S3** DHE and DAPI staining (x100) and semi-quantitation in kidney sections from male db/m, db/m *Nrf2* KO, db/db and db/db *Nrf2* KO mouse kidneys at the age of 16 weeks. Values are expressed as mean  $\pm$  SEM, n=6 per group for staining. Statistics were done by one-way ANOVA, followed by Bonferroni post-hoc test. \* $p < 0.05$ ; \*\* $p < 0.01$ ; \*\*\* $p < 0.005$  vs. db/m.

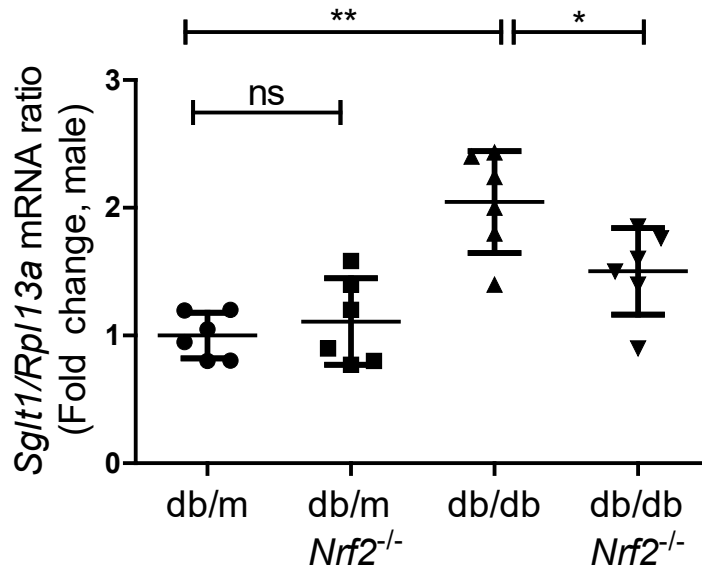

**Figure S4.** RT-qPCR analysis of Sglt1 mRNA levels in RPTs of male db/m, db/mNrf2 KO, db/db and db/dbNrf2 KO mice at age 16 weeks (n=6 per group). Statistics were done by one-way ANOVA, followed by Bonferroni post-hoc test. \*p<0.05; \*\*p<0.01; \*\*\*p<0.005.

**Supplemental Table S1**  
Primary antibodies

| Antibody (Host)            | WB/IHC (Diultion)          | Supplier                 | Cat#          |
|----------------------------|----------------------------|--------------------------|---------------|
| NRF2 (mouse monoclonal)    | WB(1:500);                 | Santa-Cruz               | sc-365949     |
| NRF2 (rabbit polyclona)    | IHC (1:400)                | Abcam                    | ab36113       |
| KEAP1 (rabbit polyclonal)  | WB(1:2000);                | Abcam                    | ab66620       |
|                            | IHC (1:400)                |                          |               |
| AGT (rabbit polyclonal)    | WB(1:2000);                | Generated in our lab (1) |               |
|                            | IHC (1:200)                |                          |               |
| HO-1                       | IHC (1:400)<br>WB (1:2000) | ENZO                     | ADI-SPA-895-D |
| NOX4                       | IHC (1:400)                | Abcam                    | ab109225      |
| CATALASE                   | IHC (1:100)                | Sigma-Aldrich            | SAB5700937    |
| SGLT2                      | IF (1:300)                 | Abcam                    | Ab85626       |
|                            | WB (1:1000)                | Alomone                  | AGT-032       |
| β-Actin (mouse Monoclonal) | WB (1:10000)               | Sigma-Aldrich            | A5441         |
| CD36 (for mouse kidney)    | IHC (1:200)                | R&D Systems              | AF2519        |
| CD36 (for human kidney)    | IHC (1:400)                | Proteintech              | 18836-1-AP    |
|                            | WB (1:1000)                |                          |               |
| FABP4 (for mouse kidney)   | IF (1:400)                 | R&D Systems              | AF1443        |
| FABP4 (for human kidney)   | IF (1:400)                 | R&D Systems              | AF3150        |
| LTL                        | IHC (1:200)                | Invitrogen               | L32480        |

(1) Wang L, Lei C, Zhang et al. Synergistic effect of dexamethasone and isoproterenol on the expression of angiotensinogen in immortalized rat proximal tubular cells. *Kidney International* 53:287-295, 1998.

## Supplemental Table S2

### Primers

| Gene (Species)          | Sense and Anti-Sense Primers    | Reference Sequence |
|-------------------------|---------------------------------|--------------------|
| Primers for genotyping  |                                 |                    |
| Nrf2 (mouse genotyping) | Common-S: GCCTGAGAGCTGTAGGCCC   | NM_010902.3        |
|                         | WT-AS: GGAATGGAAAATAGCTCCTGCC   |                    |
|                         | Mutant-AS: GACAGTATCGGCCTCAGGAA |                    |
|                         |                                 |                    |
| Primers for RT-qPCR     |                                 |                    |
| Nrf2 (mouse)            | S: CGCCGCCTCACCTCTGCTGCCAGTAG   | NM_010902.3        |
|                         | AS: AGCTCATAATCCTTCTGTCTG       |                    |
| NRF2 (human)            | S:ACACGGTCCACAGCTCATC           | NM_006164.5        |
|                         | AS:TGTCAATCAAATCCATGTCCTG       |                    |
| Keap1 (mouse)           | S: CATCCACCCTAAGGTCATGGA        | NM_016679.4        |
|                         | AS: GACAGGTTGAAGAACTCCTCC       |                    |
| Agt (mouse)             | S: CCACGCTCTCTGGATTATC          | NM_031144.3        |
|                         | AS: ACAGACACCGAGATGCTGTT        |                    |
| AGT (human)             | S:AACTGGTGCTGCAAGGATCT          | NM_000029.3        |
|                         | AS:TCTCTCTCATCCGCTTCAAG         |                    |
| Sglt2 (mouse)           | S: TTGGTGTTGGCTTGTTGCTAT        | NM_133254.4        |
|                         | AS:ATGTTGCTGGCGAACAGAGA         |                    |
| SGLT2 (human)           | S:CTGTTTGACCCGTGTACCT           | NM_003041          |
|                         | AS:CCTGTCACCGTGTAATCATGG        |                    |
| RPL13a (mouse)          | S:GCCCCACAAGACCAAGAGAG          | NM_009438.5        |
|                         | AS:TAGGCTTCAGCCGAACAACC         |                    |
| RPL13a (human)          | S:GCCCTACGACAAGAAAAAGCG         | NM_012423.3        |
|                         | AS:TACTTCCAGCCAACCTCGTGA        |                    |
| CD36 (mouse)            | S:GGAGCCATCTTTGAGCCTTCA         | NM_001159558.1     |
|                         | AS:GAACCAAAGTGAAGGATGGATCT      |                    |
| CD36 (human)            | S:CTTGGCTTAATGAGACTGGGAC        | NM_001001547.3     |
|                         | AS:GCAACAAACATCACCACACCA        |                    |
| Fabp4 (mouse)           | S:AAGGTGAAGAGCATCATAACCTT       | NM_024406          |
|                         | AS:TCACGCCTTTCATAACACATTCC      |                    |
| HO-1(mouse)             | S:GATAGAGCGCAACAAGCAGAA         | NM_010442          |
|                         | AS:CAGTGAGGCCCATACAGAAG         |                    |
| HO-1(human)             | S:AAGACTGCGTTCCTGCTCAAC         | NM_002133          |
|                         | AS:AAAGCCCTACAGCAACTGTCG        |                    |
| Catalase(mouse)         | S:TGGCACACTTTGACAGAGAGC         | NM_009804          |
|                         | AS:CCTTGCCTTGGAGTATCTGG         |                    |
| NOX4(mouse)             | S:GAAGGGGTAAACACCTCTGC          | NM_015760.5        |
|                         | AS:ATGCTCTGCTTAAACACAATCTT      |                    |
| SGLT1(mouse)            | S:CACCGAGGGCTGACTCATTC          | NM_019810          |
|                         | AS:TGATCCGTACACCAGTACCAC        |                    |
